# Supplementary material
Source: publisher site journal article supplement (https://www.dovepress.com/get_supplementary_file.php?f=291285.docx)
Supplement: Supplementary file 1 [file get_supplementary_file.php]

Supporting Information

Integration of dual targeting and dual therapeutic modules endows self-assembled nanoparticles with anti-tumor growth and metastasis functions

Biao Chen1, Xiaoqi Dong2, Xiyuan Dong1, Quan Wang2, Meng Wu1, Jun Wu 2, Xiaoding Lou2, Fan Xia2, Wenwen Wang 1*, Jun Dai 1*, Shixuan Wang 1

1 Department of Obstetrics and Gynecology, Tongji Hospital, Tongji Medical College, Huazhong University of Science and Technology, Wuhan 430030, China.

2 Engineering Research Center of Nano-Geomaterials of the Ministry of Education, Faculty of Materials Science and Chemistry, China University of Geosciences, Wuhan 430074, China.

* Corresponding author:

petrawang@163.com (Wenwen Wang);

dj_hust1987@sina.com (Jun Dai);


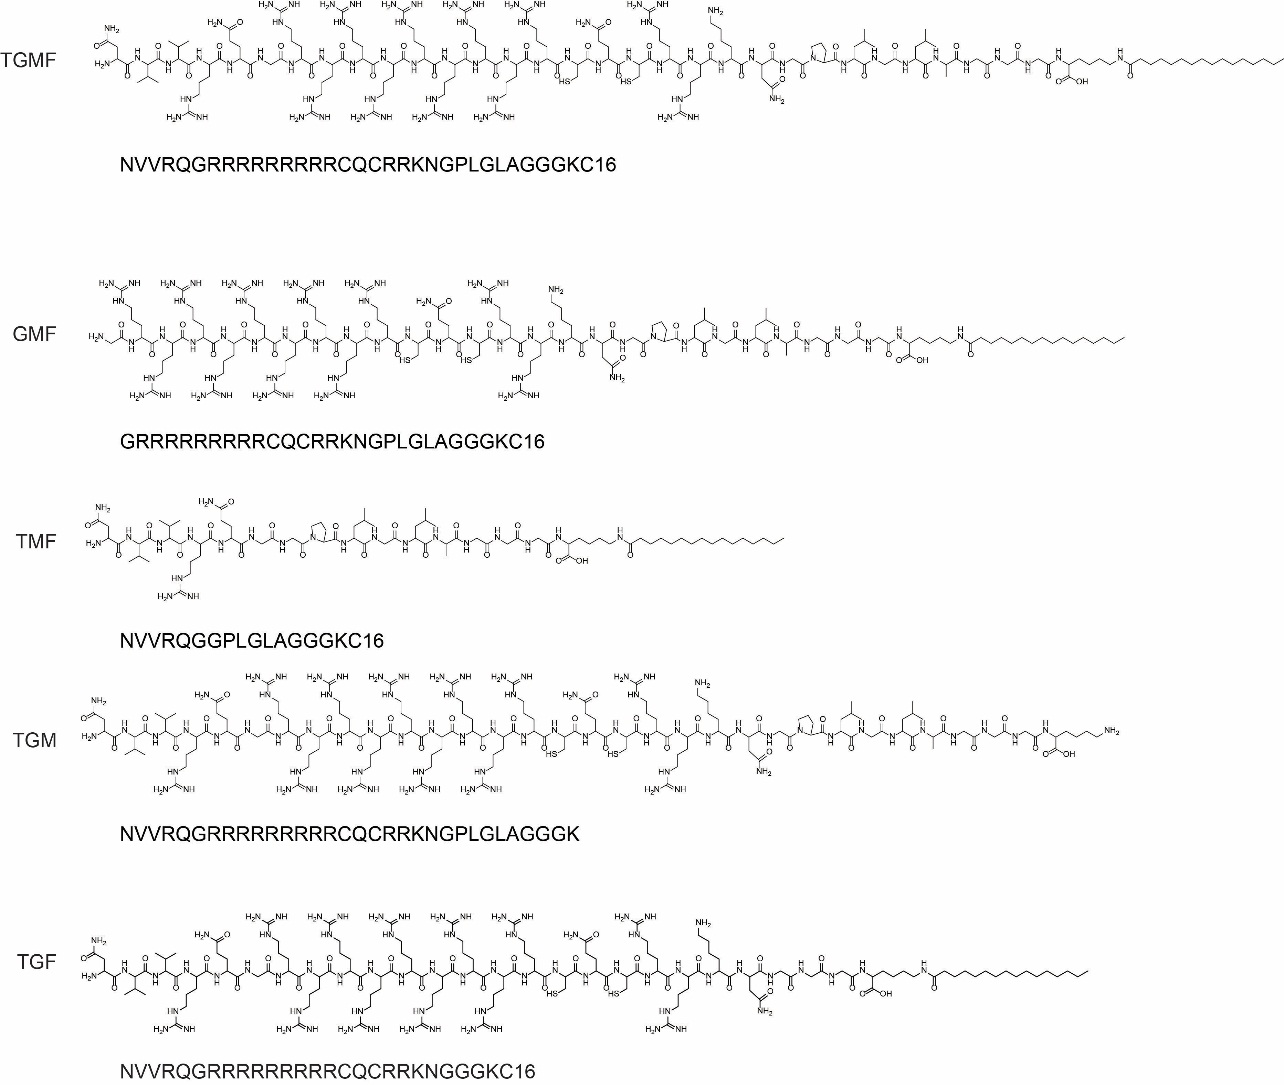


**Figure S1**. Chemical structures of TGMF, GMF, TMF, TGM and TGF.


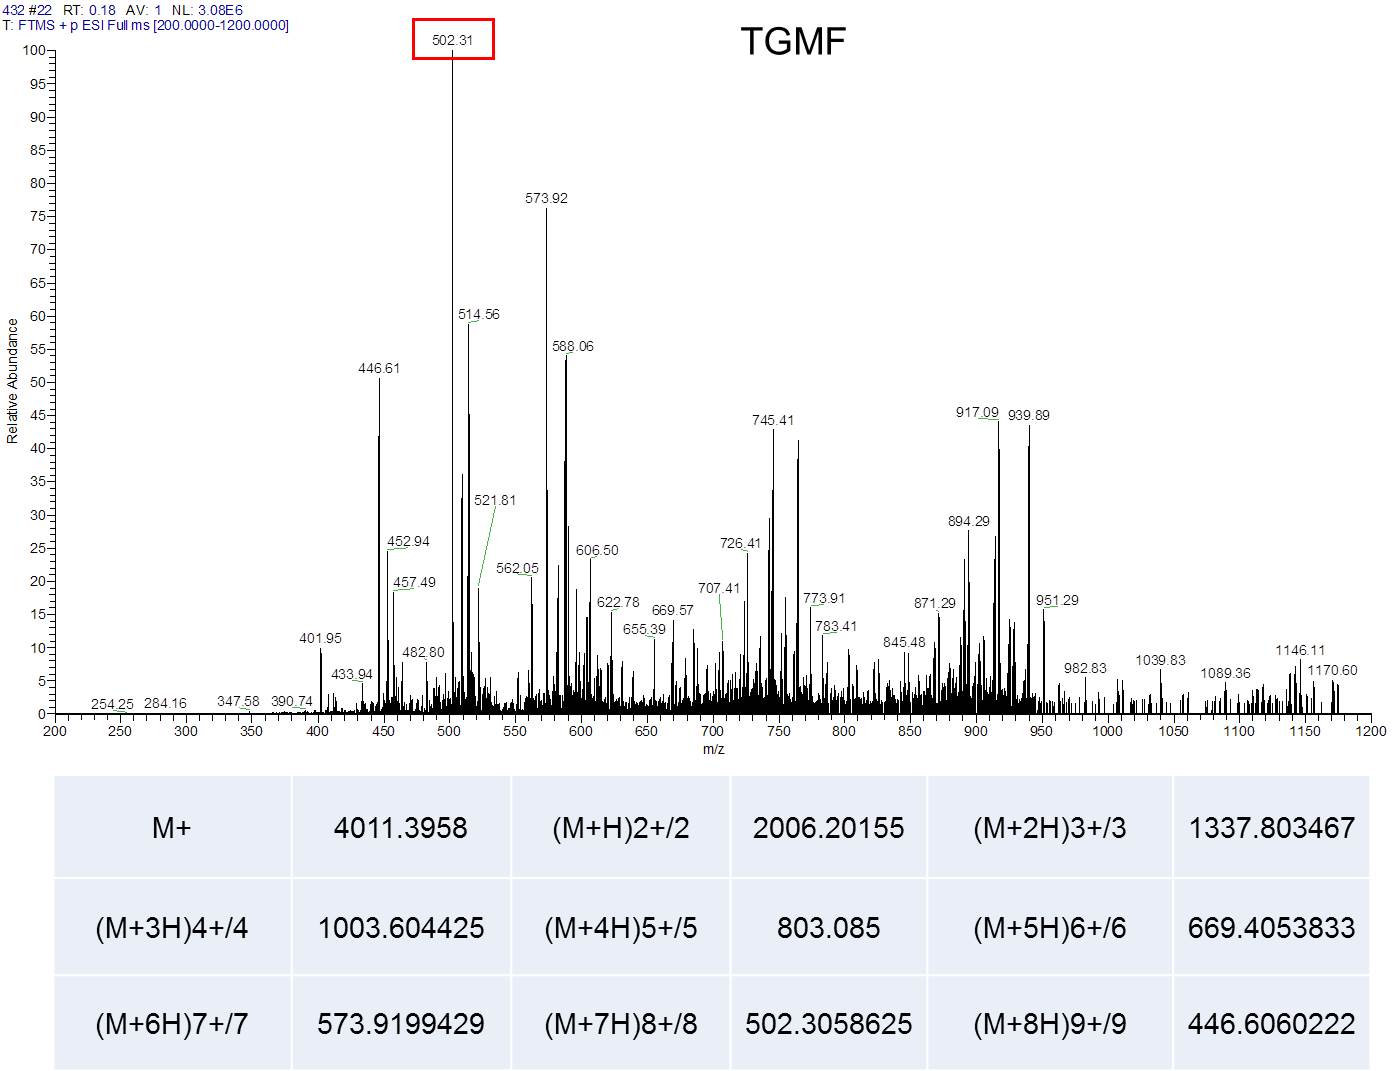


**Figure S2**. HRMS spectrum (MALDI-TOF) of compound TGMF.


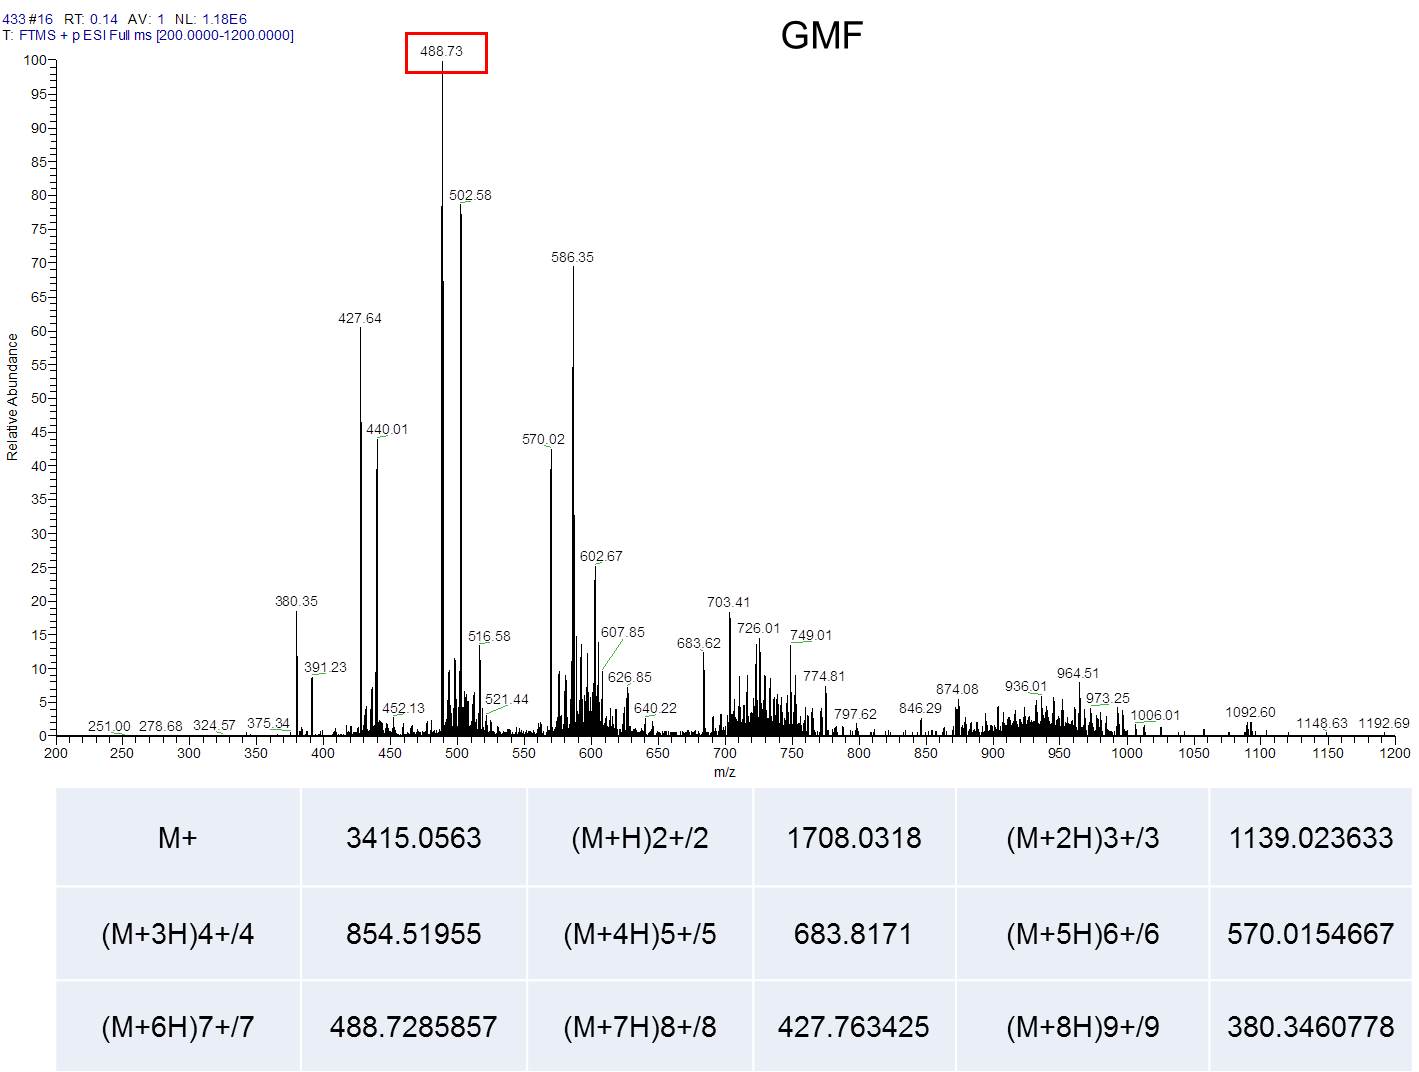


**Figure S3**. HRMS spectrum (MALDI-TOF) of compound GMF.


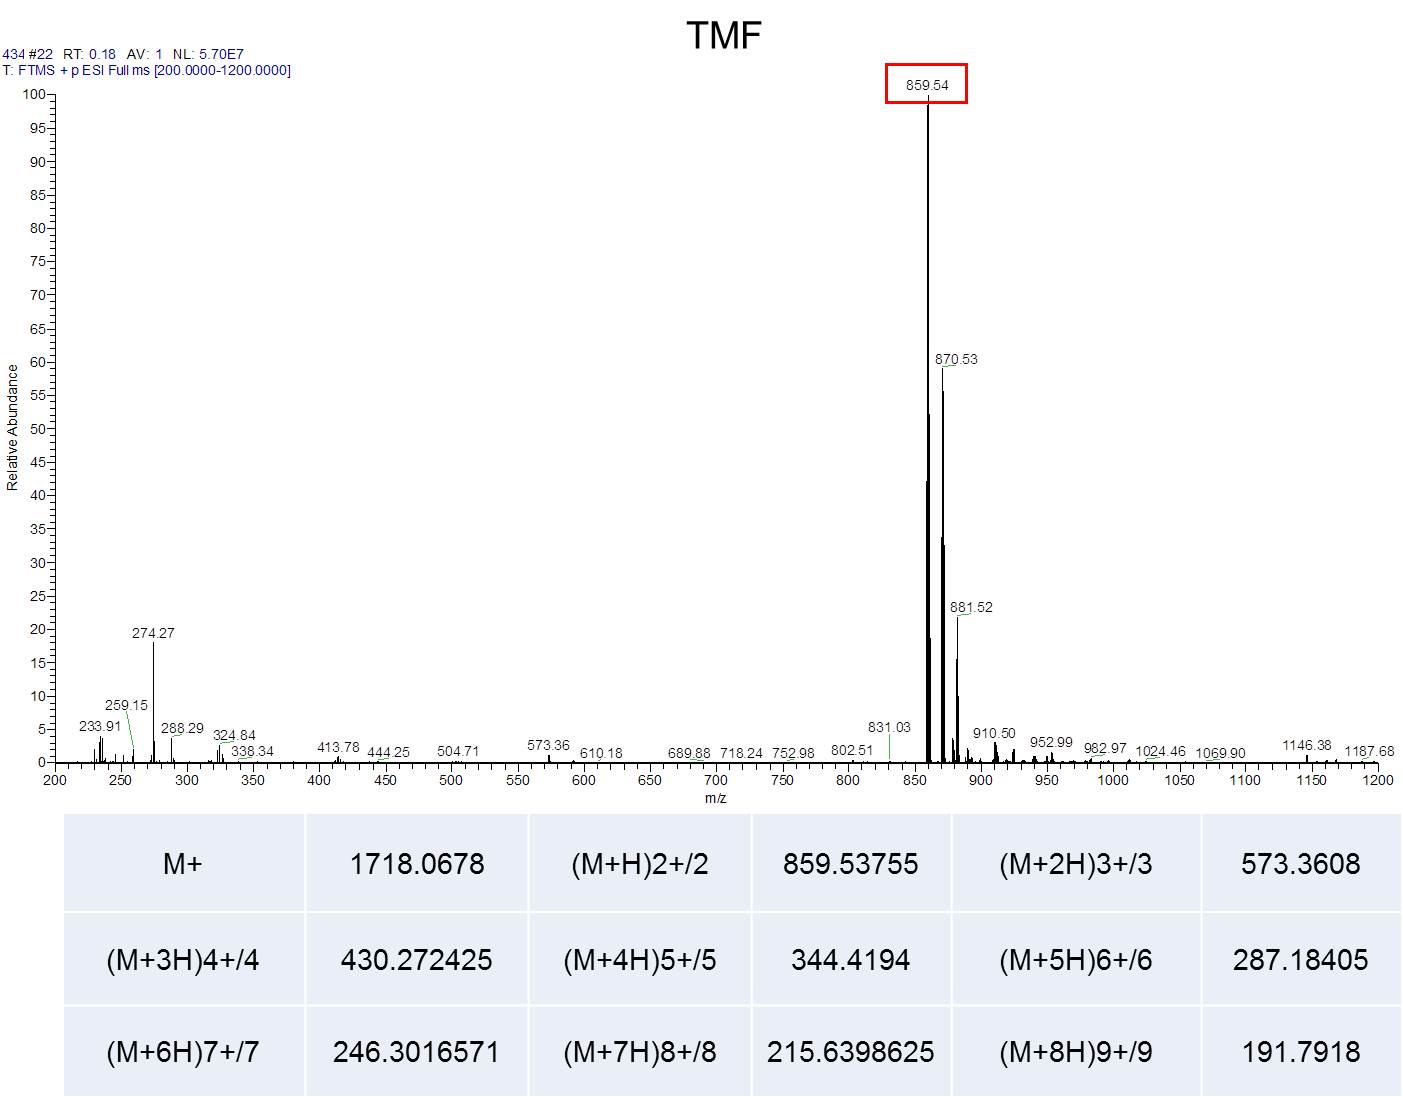


**Figure S4**. HRMS spectrum (MALDI-TOF) of compound TMF.


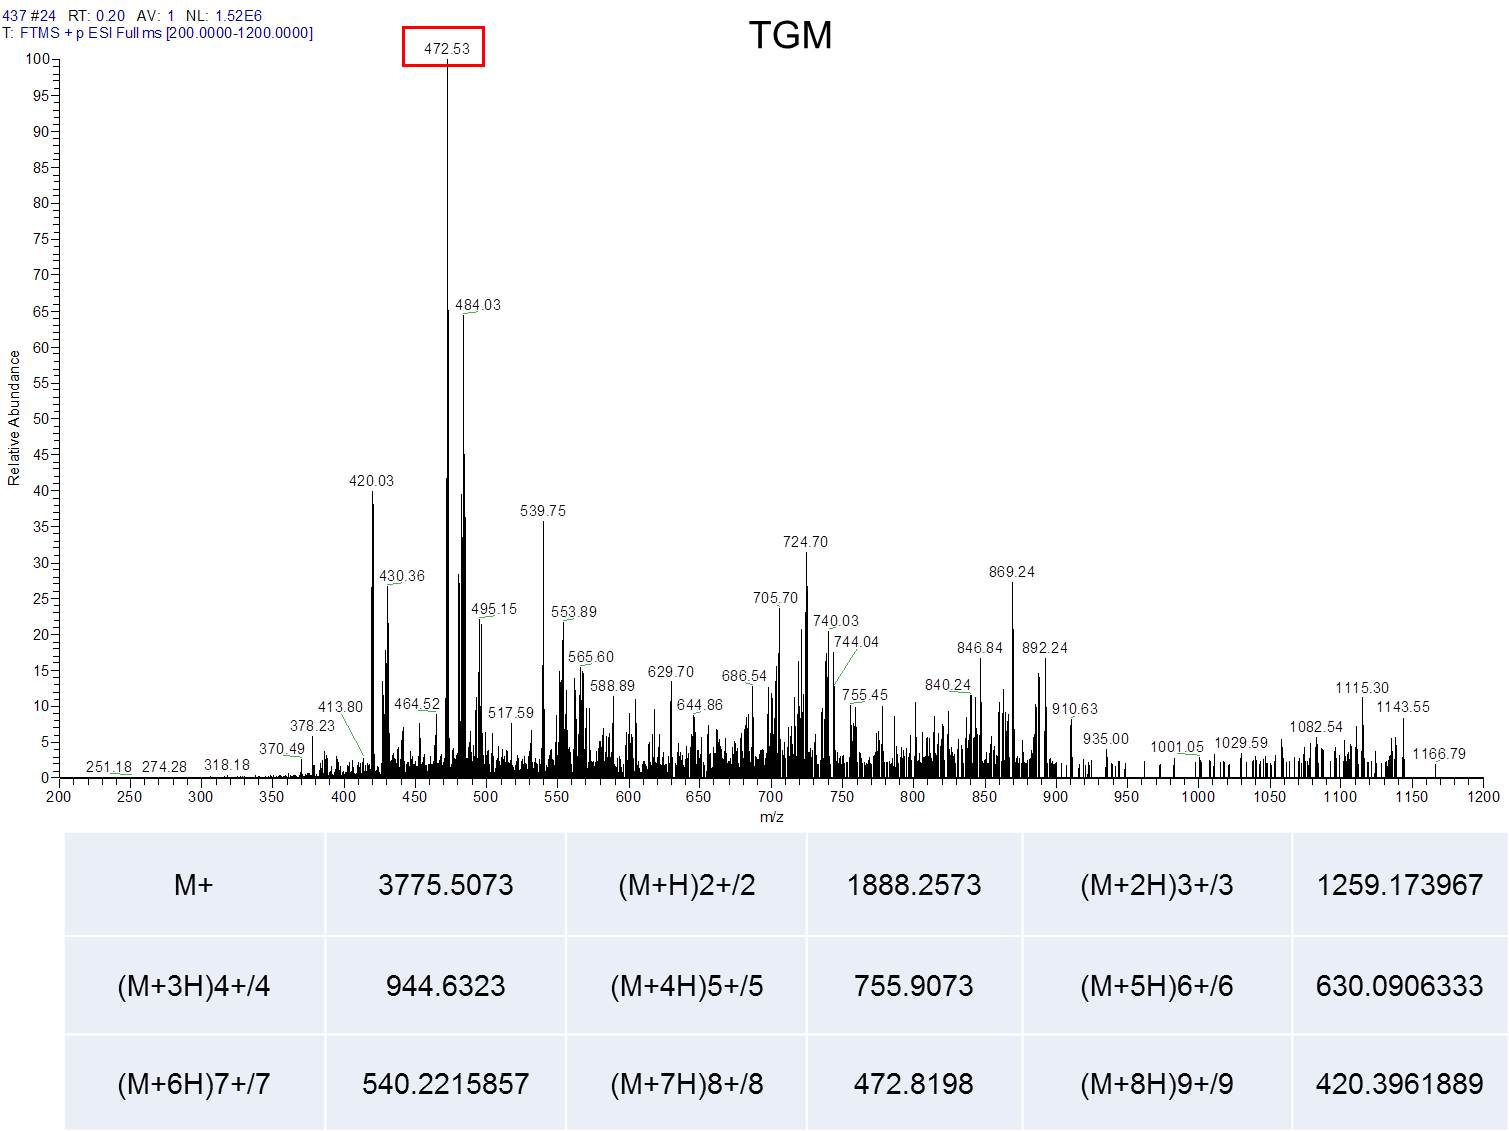


**Figure S5**. HRMS spectrum (MALDI-TOF) of compound TGM.


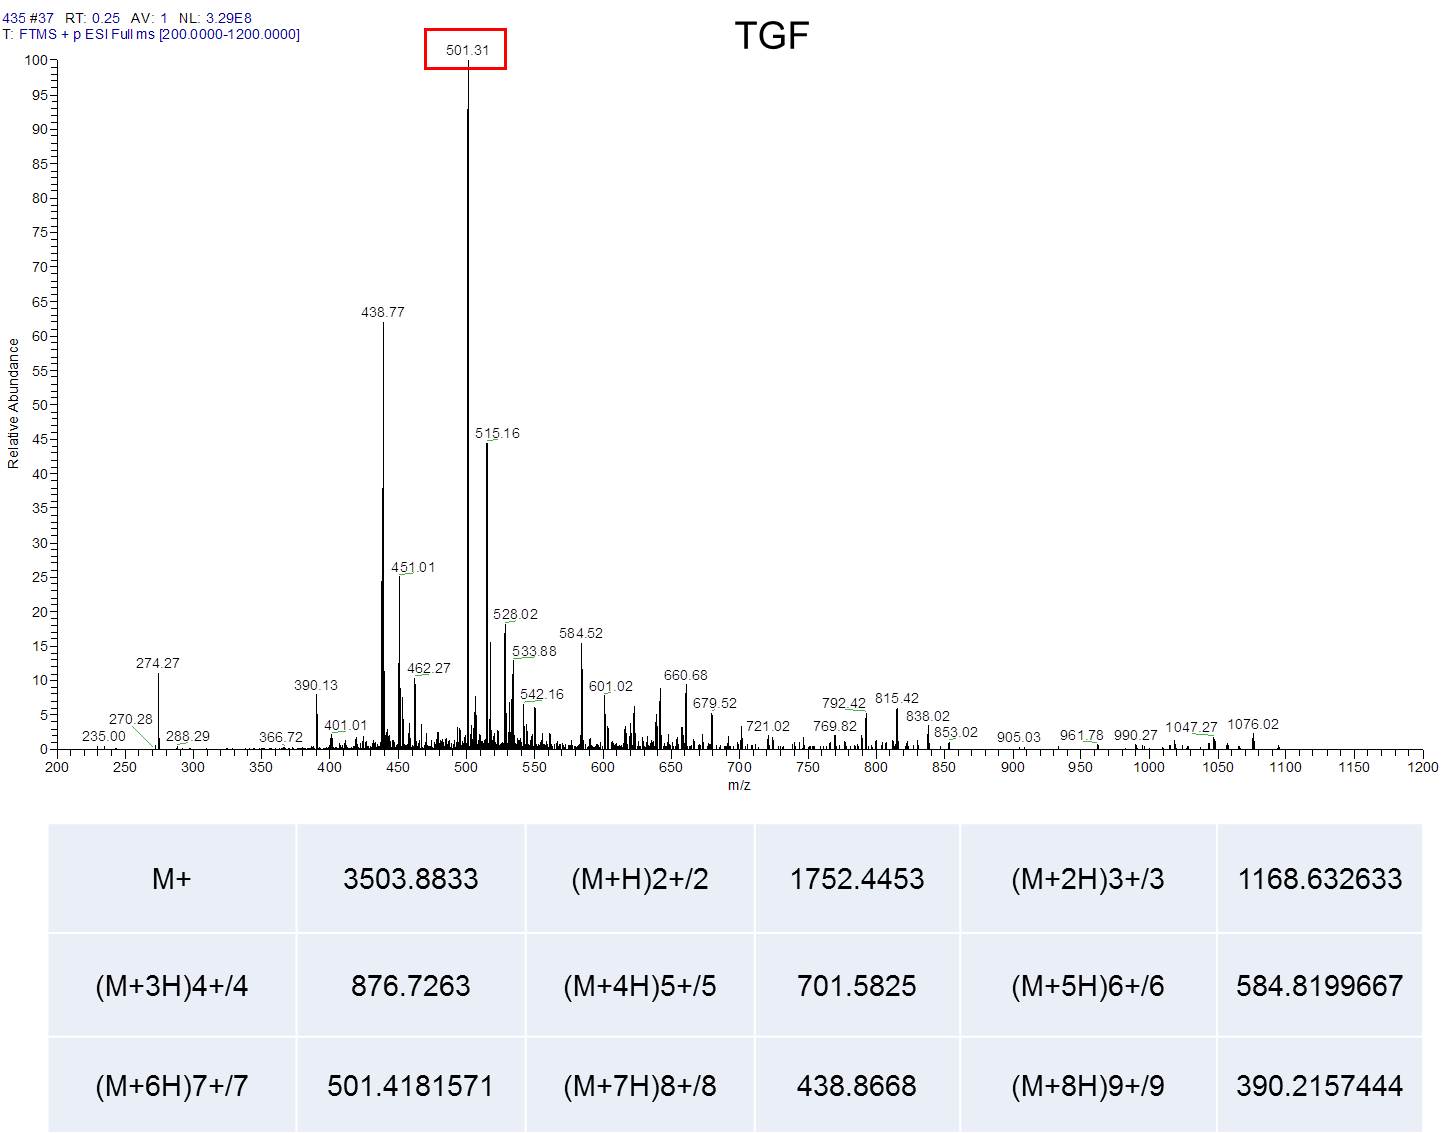


**Figure S6**. HRMS spectrum (MALDI-TOF) of compound TGF.


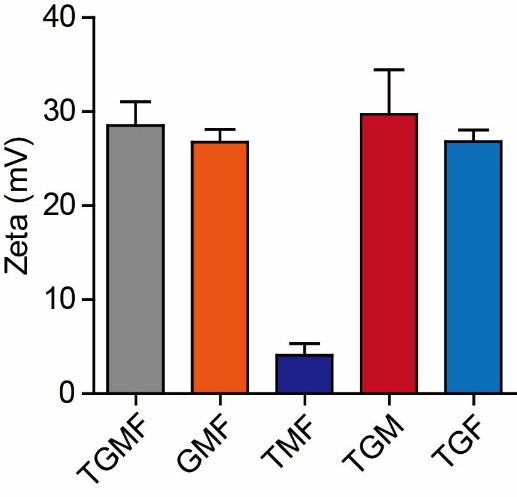


**Figure S7**. Zeta potential of TGMF (10 μM), GMF (10 μM), TMF (10 μM), TGM (10 μM) and TGF (10 μM), respectively.


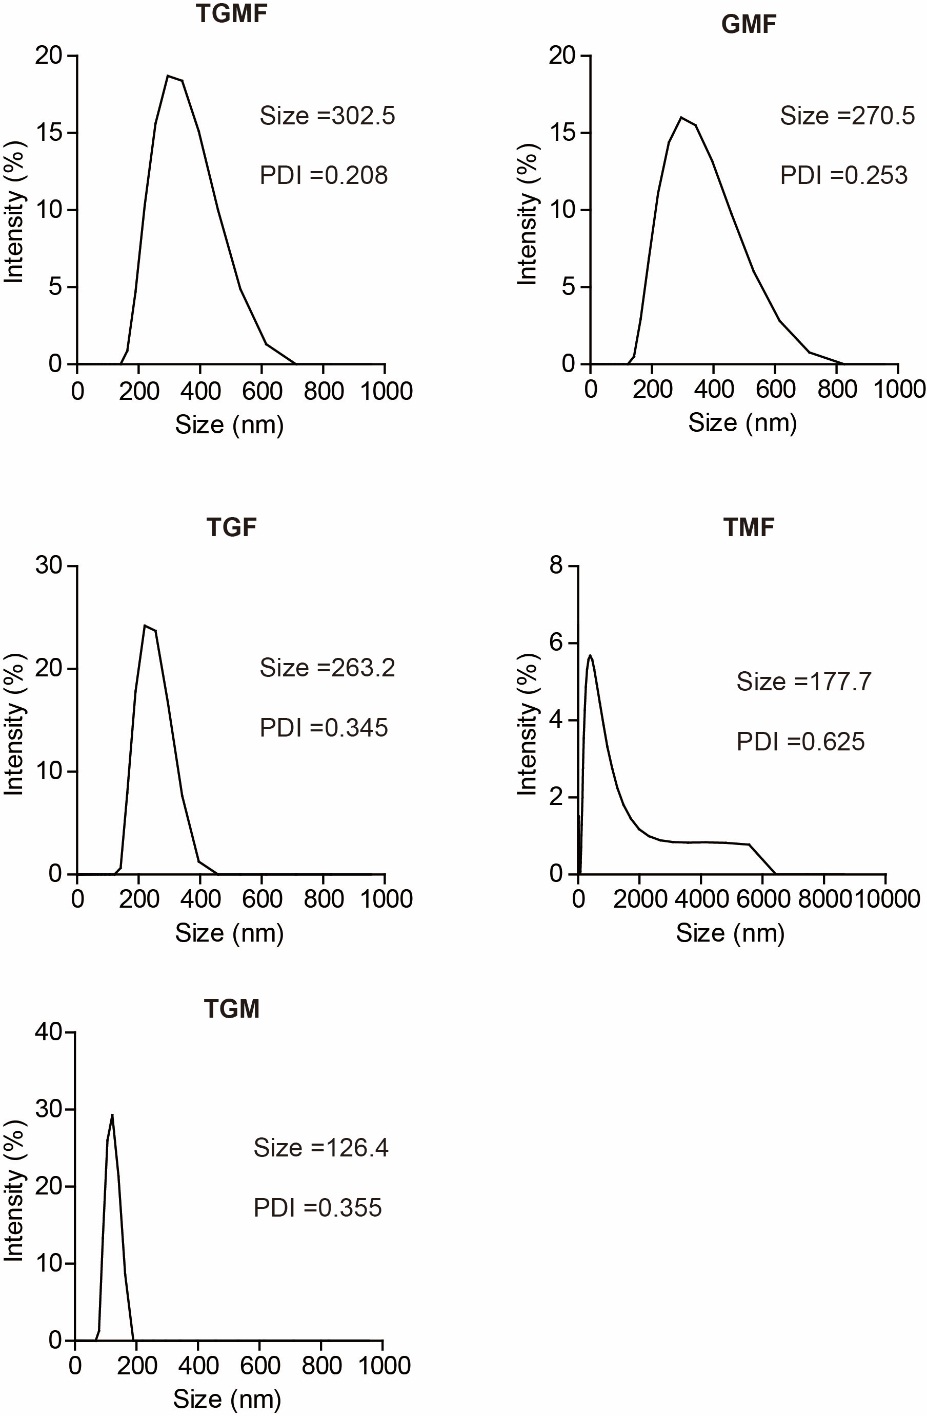


**Figure S8**. The particle size distribution of TGMF, GMF, TGF, TMF and TGM in aqueous solution was determined by dynamic light scattering (DLS).


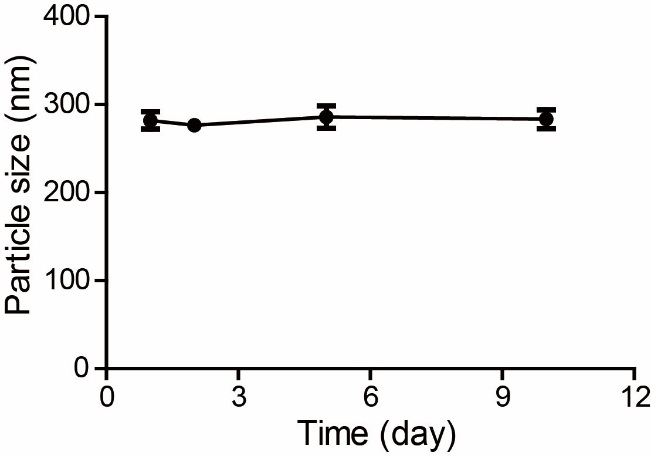


**Figure S9**. The stability of TGMF NPs in PBS solution was determined by dynamic light scattering (DLS).


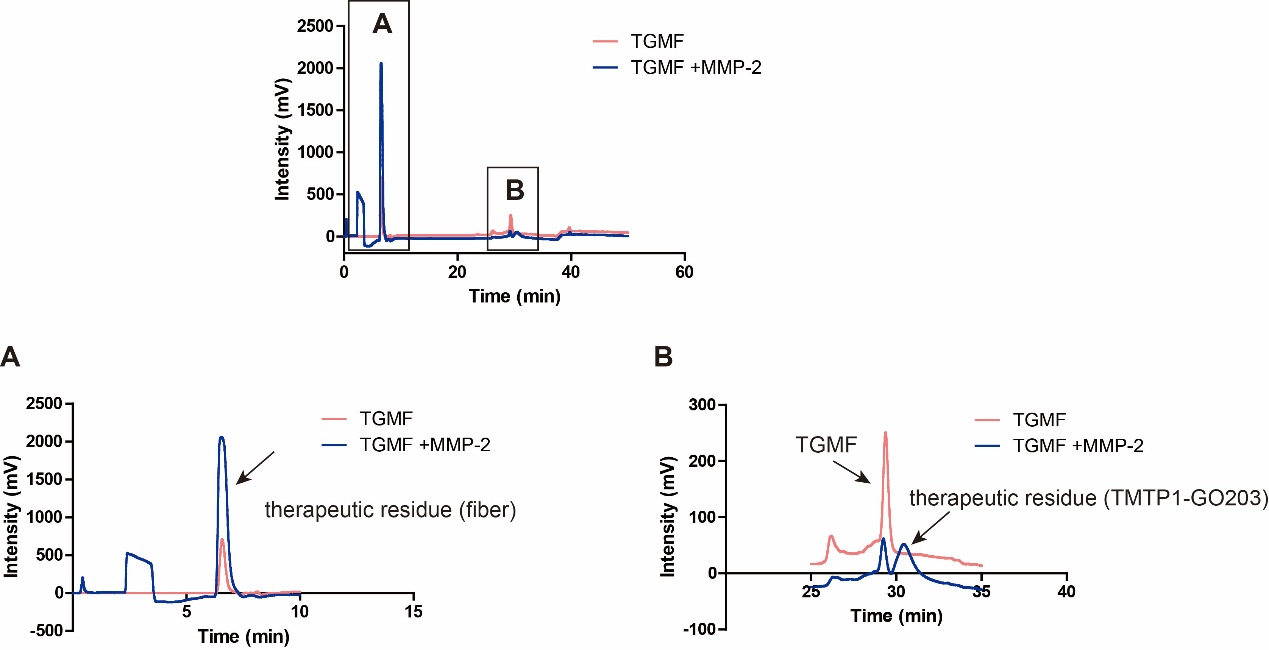


**Figure S10**. After TGMF was cleaved by MMP-2, the therapeutic residues were released. (A) Release of nanofiber therapeutic residues. (B) Release of GO-203 therapeutic residues.


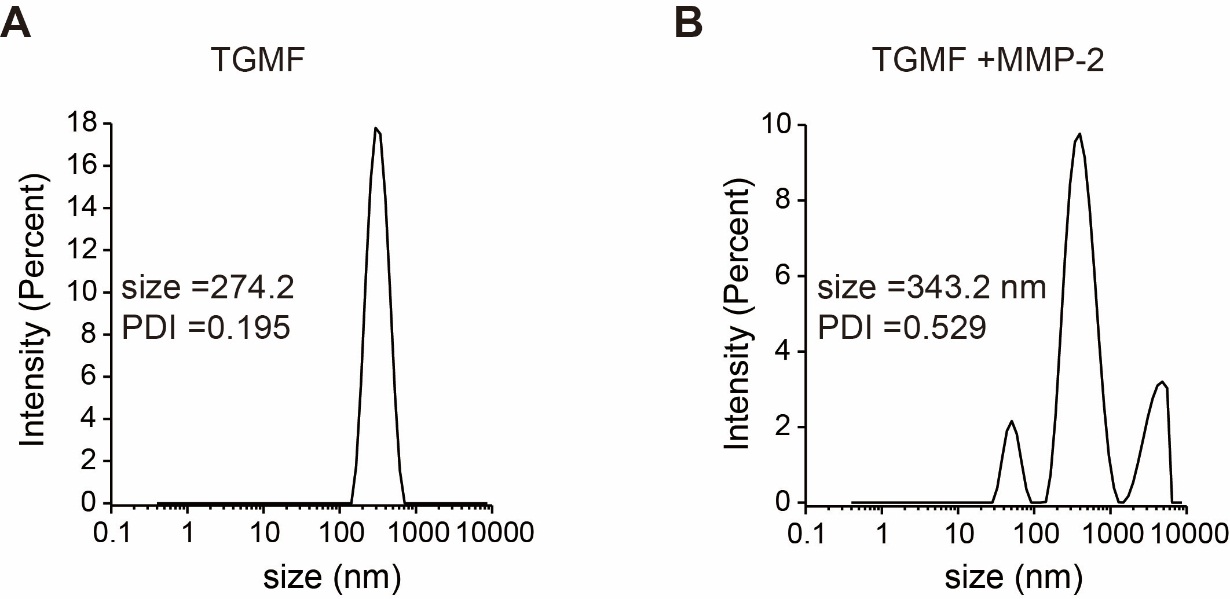


**Figure S11**. The particle size distribution of TGMF (A) before and (B) after MMP-2 treatment.


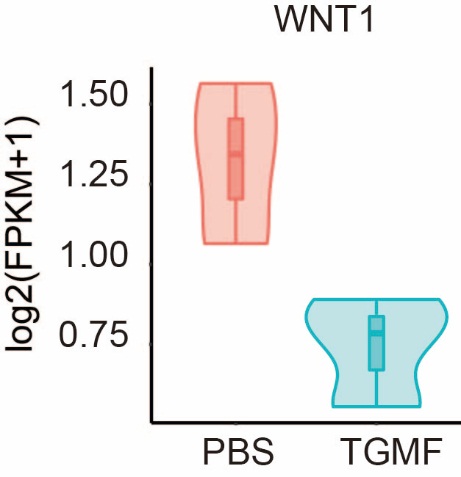


**Figure S12**. The expression of WNT1 decreased in TGMF treated HeLa cells.
